# Supplementary material for: Classical Swine Fever Virus Biology, Clinicopathology, Diagnosis, Vaccines and a Meta-Analysis of Prevalence: A Review from the Indian Perspective
Source: MDPI journal article supplement (doi:10.3390/pathogens9060500), 2020-06-22
Supplement: s1 [file s1]

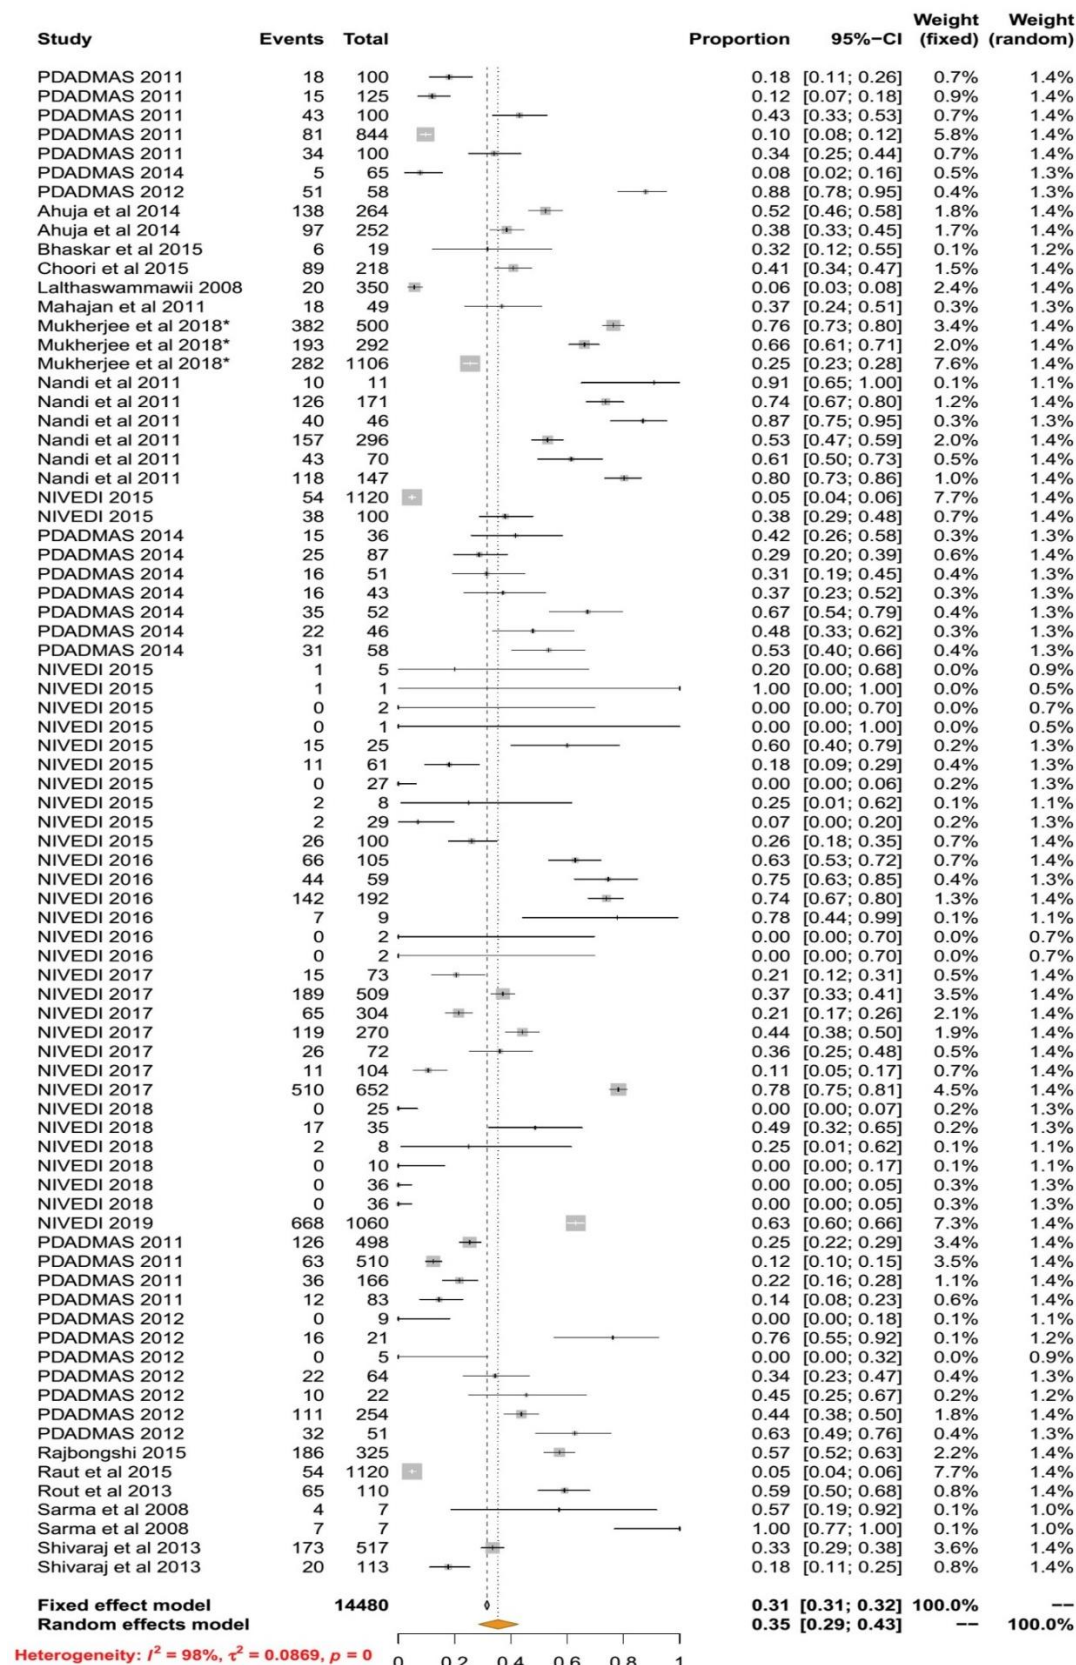

S1: Forest plot showing the prevalence of CSF in India

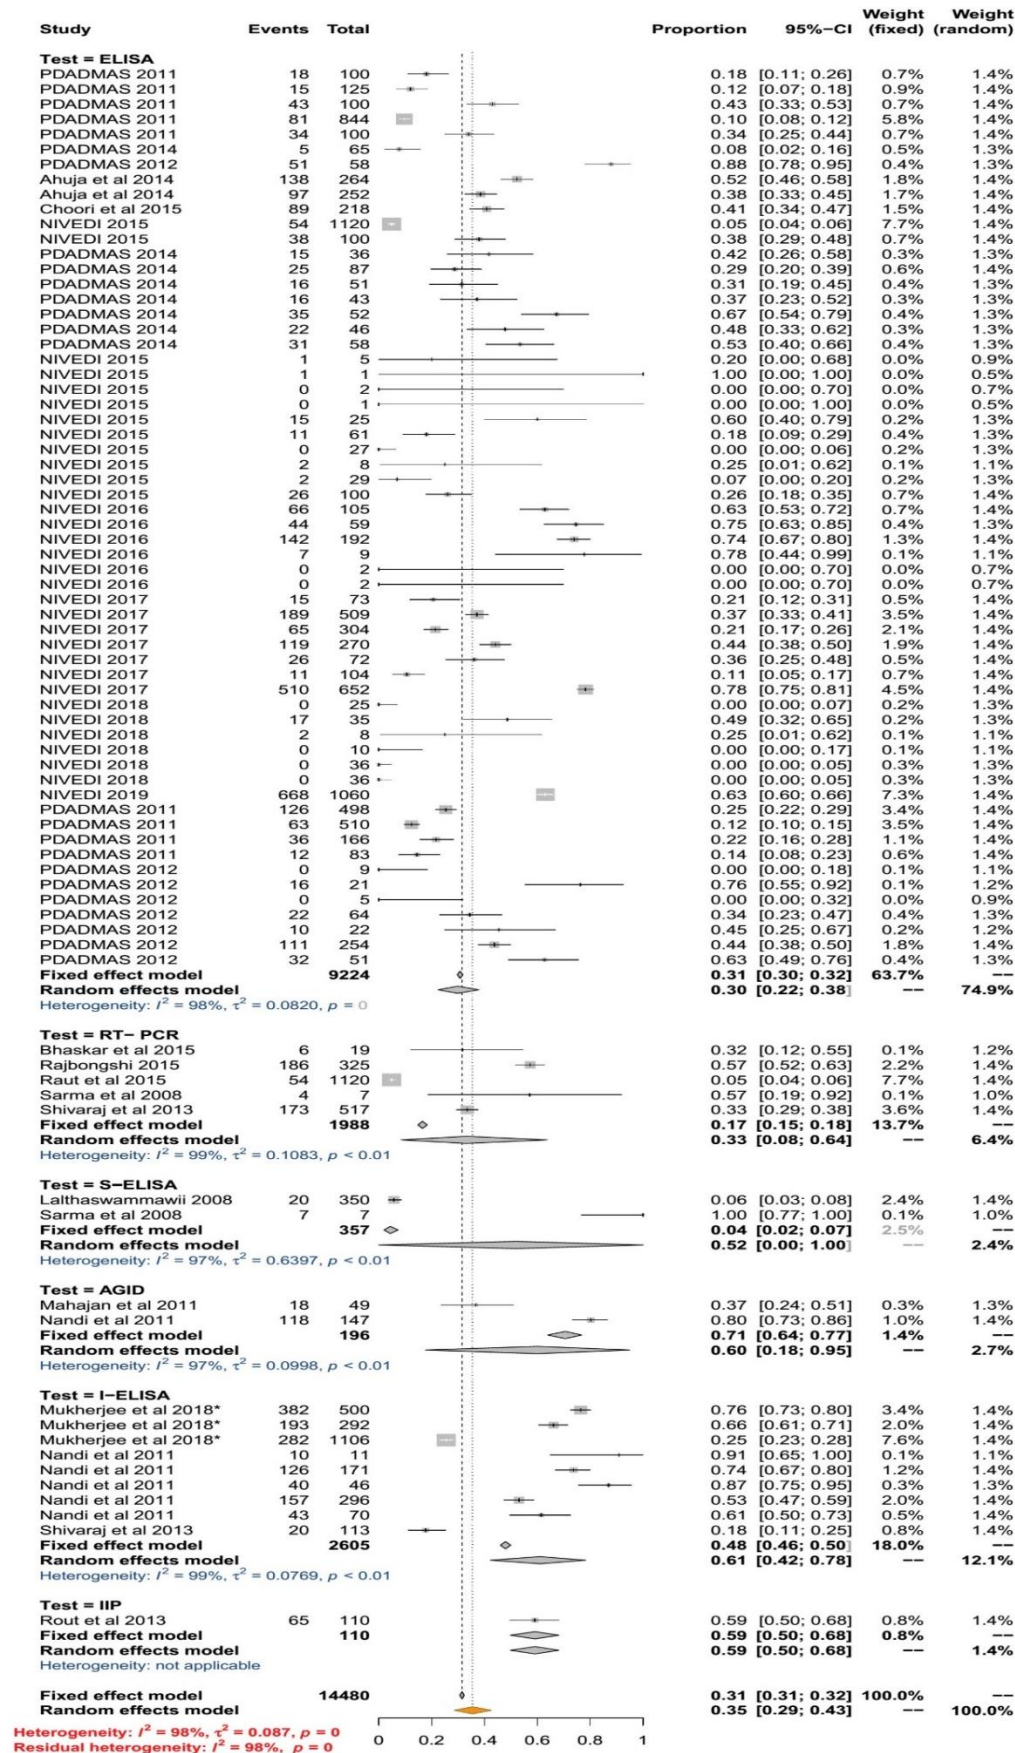

S2. Forest plot showing the diagnostic test wise prevalence of CSF in India

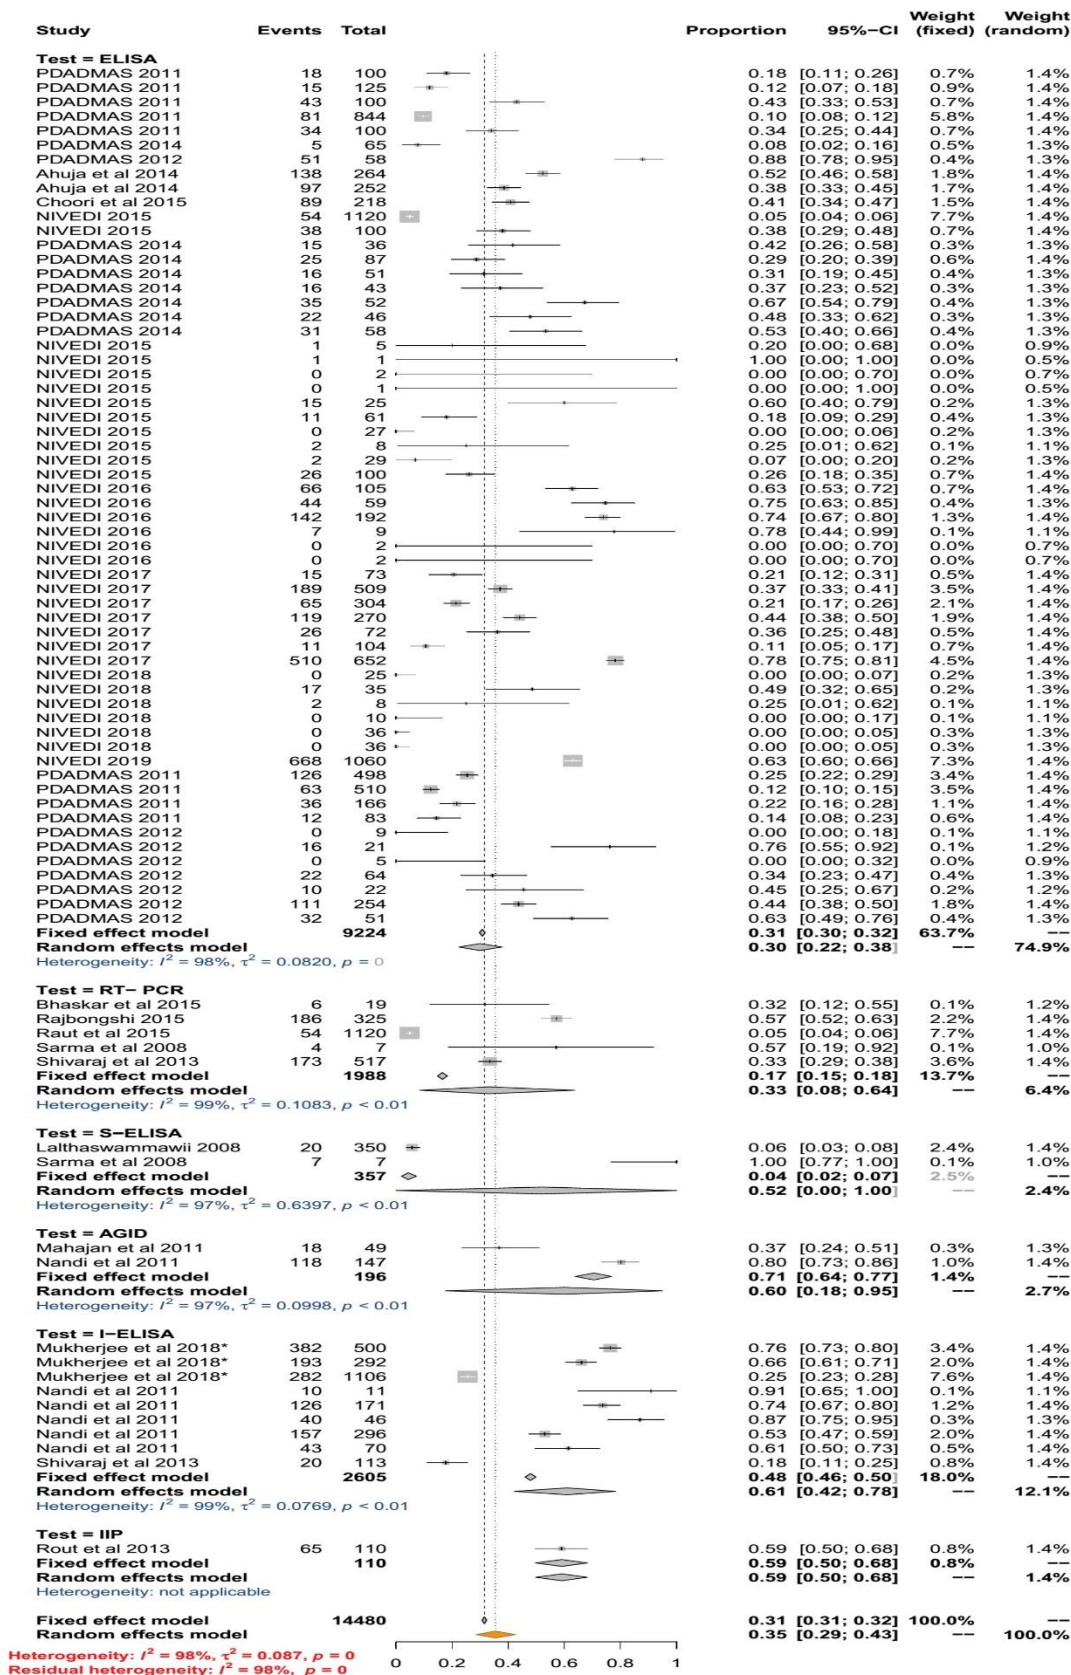

S3. Forest plot showing the region wise prevalence of CSF in India

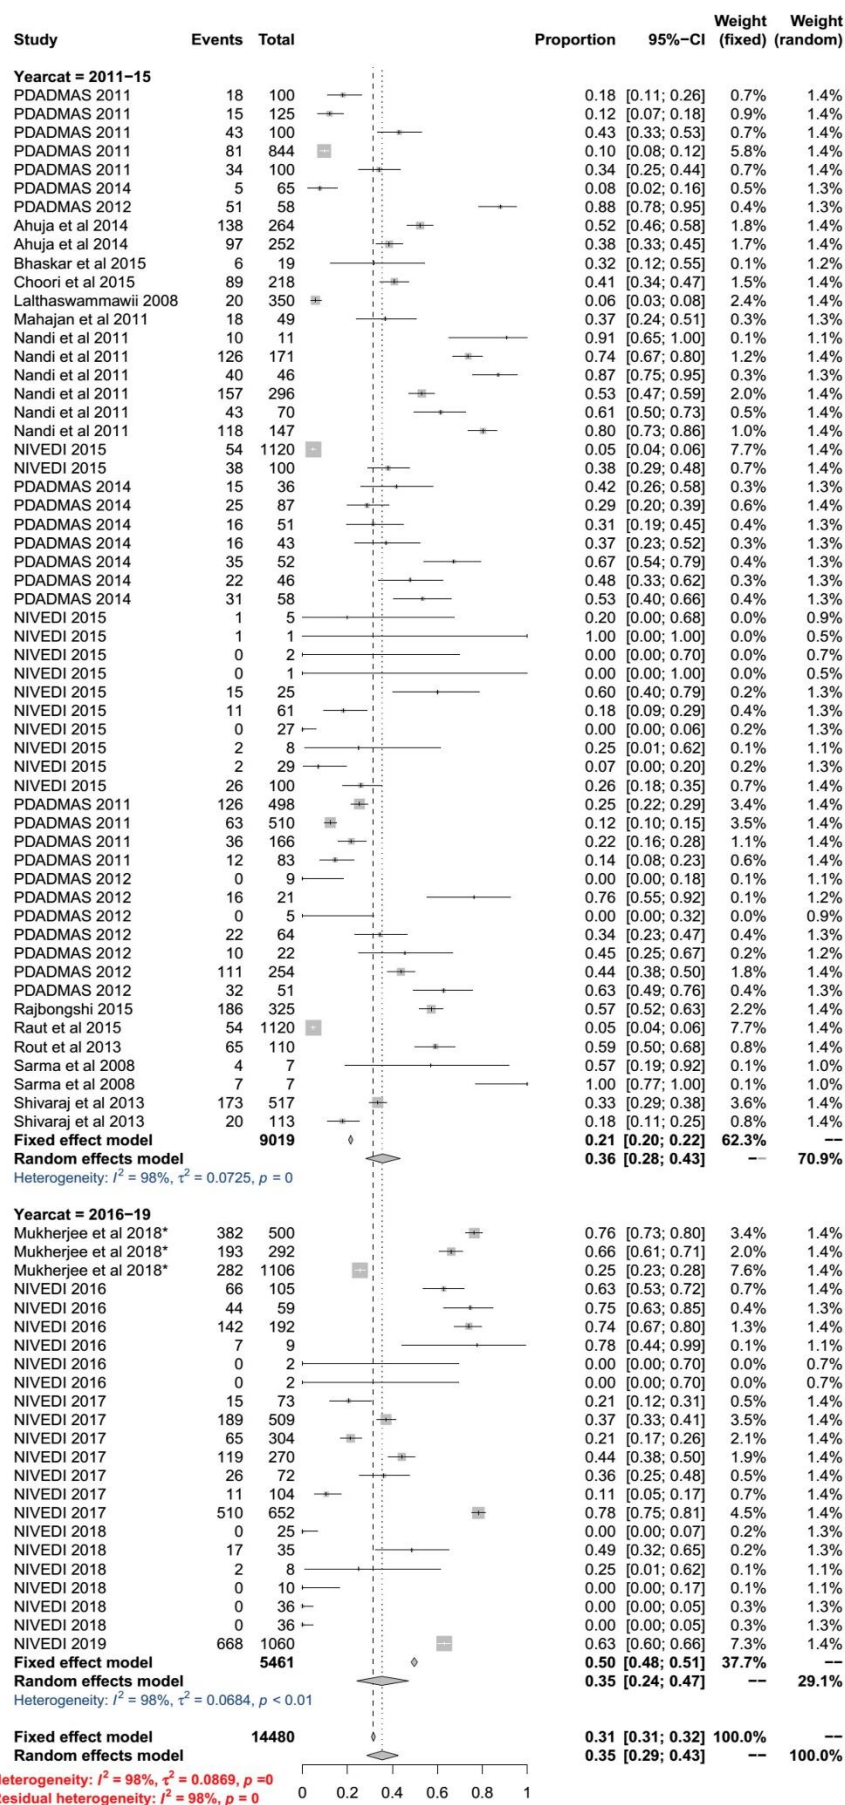

S4. Forest plot showing the year wise prevalence of CSF in India
